# Supplementary material
Source: HighWire-hosted journal article supplement (https://www.annfammed.org/highwire/filestream/8554/field_highwire_adjunct_files/0/Greene_Supp_App.pdf)
Supplement: Greene_Supp_App.pdf [file Greene_Supp_App.pdf]

## **Supplementary materials for:**

Greene J, Kurtzman ET, Hibbard JH, Overton V. Working under a clinic-level quality incentive: primary care clinician's perceptions. *Ann Fam Med*. 2015;13(3):235-241.

## **Appendix. Quality Indicators**

### **Quality Measures for All Primary Care Clinicians Other Than Pediatricians**

- Diabetes (30%): Maintaining blood pressure less than 140/90, LDL cholesterol less than 100, A1c less than 8%, not smoking, and taking aspirin daily.
- Vascular Disease (30%): Maintaining blood pressure less than 140/90, LDL cholesterol less than 100, not smoking, and taking aspirin daily.
- Depression (15%): The percentage of patients diagnosed with depression who get better after 6 months as indicated by PHQ-9 score.
- Cancer Screening (15%): The percent of adults aged 51-80 who receive appropriate cancer screening tests (cervical, breast, and colorectal).
- Asthma (10%): The percent of asthma patients with an action plan, who have received education on self-management, who are well controlled (measured by test or questionnaire score), and have fewer than 2 hospitalizations or ED visits in past 12 months.

### **Quality Measures for Pediatricians**

- Childhood immunizations (30%): The percent of 2-year-olds who receive all recommended vaccinations.
- Asthma (30%): Same as described above for adults
- Chlamydia (25%): The percent of sexually active, teenage girls who receive a Chlamydia test
- Otitis Media (15%): The percent of children prescribed first line antibiotics for non-reoccurring ear infections
